# Supplementary material for: Auditory Oddball Responses Across the Schizophrenia-Bipolar Spectrum and Their Relationship to Cognitive and Clinical Features
Source: Atypon-hosted journal article supplement (doi:10.1176/appi.ajp.2021.20071043), 2021-08-19

**Parker et al.**, “Auditory Oddball Responses Across the Schizophrenia-Bipolar Spectrum and their Relationship to Cognitive and Clinical Features.”

## **Supplemental Methods:**

**Recruitment:** Subjects were recruited at Psychosis and Affective Research Domains and Intermediate Phenotypes (PARDIP) and Bipolar-Schizophrenia Network on Intermediate Phenotypes (B-SNIP) consortium sites: University of Georgia and Augusta University, Beth Israel Deaconess Hospital, Harvard Medical School, University of Chicago, UT Southwestern Medical School, and Institute of Living/Hartford Hospital and Yale School of Medicine, and followed previously published approaches (1). For recruitment of B-SNIP1 subjects used in the replication portion, please see (1). Clinically stable participants were recruited via community advertisements, linked community facilities and programs, and local National Alliance on Mental Illness-type organizations. All subjects provided written informed consent before participation. This study was approved by Institutional Review Boards at each data collection and analysis site.

Patients had a diagnosis of schizophrenia (SZ), schizoaffective disorder (SAD), or bipolar disorder with a history of psychosis (BDP) or no history of psychosis (BDNP) based on the Structured Clinical Interview for DSM-IV-TR (SCID) (2). Medical history, Positive and Negative Syndrome Scale (3), Young Mania Rating Scale (4), Montgomery-Asberg Depression Rating Scale (MADRS) (5), Birchwood Social Functioning Scale (6), and Global Assessment of Functioning scale (Axis V of DSM-IV) were acquired by trained Masters- or Doctoral-level clinicians. Presence of serious medical or neurological illness, mental retardation, head trauma with >30 minutes unconsciousness, current substance use ascertained by history as well as urine screens on day of testing, abuse in the past 3 months, and dependence within 6 months or extensive history of drug dependence (based on SCID) were criteria for exclusion. Healthy persons were free of any lifetime psychotic or chronic mood disorders and a family history of psychotic or BP disorders in first-degree relatives. Clinical information and diagnoses were reviewed and confirmed at diagnostic consensus meetings including senior psychiatrists/psychologists and the clinician who conducted the structured interviews at each site. All possible efforts were made to collect all clinical, cognitive, and EEG measures within 1 month after confirmation of inclusion into the study.

**Clinical Rater Training and Maintenance:** Clinical raters went through extensive training and certification prior to contributing ratings to the study, as well as ongoing training throughout the course of the study. Initial competency was established by on site didactic training for all clinical assessments and data collection procedures (SCID-I/P, SIDP-IV, YMRS, MADRS, PANSS, SFS, SBS, clinical history and demographics), followed by a pencil and paper competency evaluation (100% accuracy required), and finally the establishment of inter-rater reliability. Inter-rater reliability was accomplished using a train-to-criterion protocol with recorded patient interviews (for symptom scales all total scores were required to be within 2 points of the standardized score and all individual item scores were required to be within 1 point of the standardized score; for diagnostic assessments 100% agreement was required for the primary diagnosis). Remediation and additional training was provided as needed on a case-by-case basis until competency was achieved; clinical raters were not otherwise allowed to contribute data to the study. In order to maintain competency and reduce “drift,” in-person didactic re-training sessions were conducted annually and inter-rater reliability established at 6 month intervals. Additionally, monthly diagnostic consensus calls (SCID-I, SIDP, SBS) were held throughout the course of the study, allowing for ongoing assessment monitoring and training (1).

**Comparison between B-SNIP1 and B-SNIP2 Subjects:** Subjects from B-SNIP1 overlap with Ethridge et al. and Clementz et al. (7; 8) and each step of quality control was completed using the exact steps as outlined in the main text. Following identical steps used in the main text, ERP PCA components

were identified for Standard (Frontal) and Target (Frontal and Parietal) trials using the combined B-SNIP1 and B-SNIP2 samples. In order to compare responses between studies, each ERP time point was standardized by using the mean and standard deviation from all subjects across all time points for each ERP component from each study. A direct comparison between of the mean ERP response of B-SNIP1 and the new subjects from B-SNIP2 as performed by group. Figure one is a straightforward illustration of the similarity of ERP morphologies by DSM diagnosis illustrating the strong replication of auditory oddball ERP findings across the psychosis spectrum. For each group in both studies (BDNP was not included since BDNP was not collected during B-SNIP1), the mean ERP response from -100 to 600 ms from B-SNIP1 was correlated with the mean ERP response from B-SNIP2.

Additionally, group by study ANOVAs were calculated on each 20 ms time bin from -100 to 600 ms. Calculations from G\*power indicated the group x study ANOVAs with  $n=1761$  are able to capture Cohens  $f$ -effect sizes in the .07-.09 range (.8-.99 power,  $\alpha=.05$ ). All ANOVA  $p$ -values within each component were adjusted using a false discovery rate method (9). This is identical to the procedure used in the group by sex ANOVA used in the primary text. There were no significant group by study interactions at any time-bins from any of the ERP components.

95% Confidence intervals of the effect size for the group x study interactions were calculated across time bins for each component using a bootstrapping procedure (bootstrap=5000 iterations; uncorrected for multiple comparisons) (10). The average  $f$ -effect size for the group x study interactions were Standards ERP =.044, Targets Frontal ERP=.039, Targets Parietal ERP=.045. A Cohen's  $f$ -effect size of .1 indicates a small effect size. See Figure S3.

Equivalence contrast tests were calculated on the total study samples (B-SNIP1 vs B-SNIP2), Healthy comparison groups, and all psychosis subjects for each ERP component across time bins (uncorrected for multiple comparisons). Equivalence testing demonstrates whether mean differences between groups are small enough that the differences can be considered clinically unimportant and that they can be treated as equivalent. A clinically significant threshold was set at  $\pm .1$  common language effect size. Common language effect size corresponds to the probability of that a random score from group A will be larger than a random score from group B. A value of .5 indicates that the two samples are identical. The 90% CI of each contrast was calculated using a bootstrapping procedure (bootstrap=5000 iterations) (10; 11). Consistent with the main factor of "study" from the ANOVA results, the average contrast value across time bins for the "total sample" were: Standards ERP =.52, Targets Frontal ERP=.51, Targets Parietal ERP=.49. See Figure S3.

**Research Site Effects:** In order to ensure consistent EEG recordings across research center sites, a number of steps were taken. Each site had identical EEG equipment and software in order to collect data. Every year, multiple pilot subjects went to each research center and completed the OB EEG task under identical conditions as the research participants. This allowed for the researchers to harmonize potential differences in EEG set-up, data collection, and presentation of the stimuli. Additionally, after the data had been pre-processed, age-adjusted, and was ready for final analysis, a group by site ANOVA was performed on each 20-ms bin from -100 to 600 ms for each ERP component. No significant group by site interactions were found. This is consistent with (12; 13) which examined other auditory paradigms using overlapping research participants.

**EEG Recording:** Electroencephalogram (EEG) was continuously recorded from 64 silver/silver chloride sensors (impedance <10 k $\Omega$ ; QuikCap, Compumedics Neuroscan, El Paso, Texas), positioned according to the standard 10-10 EEG system with mastoids and CB1/2 locations to provide greater sampling below the canthomeatal line, with nose reference and forehead ground. Recordings were amplified (12,500X) and digitized (1000 Hz) using Neuroscan ACQUIRE and SynAmps2 recording systems (Compumedics Neuroscan).

**EEG Processing:** EEG data were pre-processed following previously published methods (7; 12–14). Raw EEG data were inspected for bad sensors and artifacts. Bad sensors were interpolated (no more than 5% for any subject) using spherical spline interpolation (BESA 5.3; MEGIS Software, Grafelfing, Germany). Data were transformed to an average reference and down-sampled to 500 Hz and digitally band pass filtered from .5 Hz to 55 Hz (zero-phase filter; roll-off: 6 and 48 dB/octave, respectively). Blink and cardiac artifacts were minimized using independent component analysis (EEGLAB 13.6) (15). EEG data on each trial were then segmented into 1250-ms epochs extending from 250 ms before to 1000 ms after trial onset. Trials containing activity  $\pm 75$  mV at any sensor were eliminated from further processing. Since our previous study (7) confirmed similar percentages of correct responses (~90%) to target trials across patient groups, all artifact-free target trials were included in subsequent analyses (7). At least 50% of trials were accepted for all included subjects with no significant difference between groups on number of usable trials. Data from included trials were averaged for each subject to create a 64-sensor grand average ERP. Each ERP was baseline adjusted using the 100 ms pre-stimulus period (see Figure 1 and 2).

**Frequency principal component analysis:** In order to identify frequency bands of interest we performed a frequency principal component analysis (fPCA) using the following steps: power values from each time-bin from 0 to 600 ms were averaged for standards and targets. All subjects' data were concatenated to create a matrix of 50 variables (3-52 Hz) and  $(t * n) \times 64$  observations (where  $t$  is trial type and  $n$  is the number of subjects;  $t=2$  (standards and targets);  $n=1078$ ). An fPCA was carried out on the matrix with promax (oblique) vector rotation and Kaiser normalization (16). Scree tests identified three components accounting for greater than 95% of the variance across subjects and sensors. The three resulting fPCA components were: (i) low (3-13 Hz); (ii) beta (14-29 Hz); and (iii) gamma (30-52 Hz) frequencies (see Figure S1). This result is highly consistent with previous results from B-SNIP<sub>1</sub> (7) and captures the cortically relevant frequency bands resolvable with EEG (17). Each fPCA component weight was multiplied by each subject's grand average time-frequency data at each time bin, summed across frequencies, and divided by the plus sum of the component weights, reducing the waveform from 50 frequencies (3-52 Hz) to three frequency bands. This resulted in 6 total waveforms (three standard and three target). For each frequency component, all sensors were averaged to create one time-frequency waveform (Figure 3). Each time-frequency waveform was then standardized across all subjects, so frequency data are displayed in standardized Power values.

**Multivariate Canonical and Correlational Analyses:** A canonical discriminant analysis (CDA) is similar to PCA, but uses pooled within-group covariance matrices and pits group means as variables and measurements as observations (18; 19). Thus, the  $n^{\text{groups}}-1$  functions are extracted, which are uncorrelated and maximize group differences. CDA creates a linear combination of the predictors that have the highest possible within-group (see figure 4a). The p-value presented in the main text is associated with the Chi-square statistic, which is testing the null hypothesis that: the function, and all functions that follow, have no discriminating ability. This is part of the standard output in SPSS. Additionally, it is possible to examine group mean differences of the function scores using traditional statistics like ANOVAs and post-hoc tests, which are included in tables S2 and S3. The correlation between each discriminant function and the 26 EEG variables are listed in table S4 so that the interested reader can see how individual EEG variables are related to the overall discriminant functions.

The canonical correlational analyses we used for comparing the EEG variables and Cognitive variables/ EEG variables and Clinical variables are similar to a CDA, but instead of creating functions that are uncorrelated and maximize group differences, it creates a linear combination latent function pairs for each data set (i.e. 1 Neural and 1 Cognitive) that are maximally correlated with each other, but uncorrelated with the any of the other latent function pairs. The number of latent pairs is based on the data set with the fewest variables ( $n=6$  for both CCAs in the main text). The p-value statistic presented in the text is based off of the F-value from the Wilks' Lambda multivariate test with a null hypothesis that

the two sets of variables are not linearly related. In tables S5 and S6 we also have the structure matrices that list the correlation between each latent pair and the variables that went into each function so that the interested reader can see how individual variables are related to the function pairs.

**Supplemental Analyses to identify restricted list of measures:** Each of the 26 variables were submitted to linear discriminant analysis (LDA) with group as the dependent variable (HC, BDNP, BDP, SAD, and SZ). EEG variables that minimized overall Wilks' lambda at  $p < .05$  were entered in a stepwise fashion, leaving a parsimonious selection of neural measures that differentiated groups. Then, to ensure that identified ERP and TF variables contributed to reliable and stable group separations, a jackknife procedure was performed by submitting 95 % of the total sample ( $n = 1024$ , sampling without replacement) to an LDA 1000 times. EEG Components consistently identified (>50% of procedures) across iterations were then used in a canonical discriminant analysis (identical to the main analysis in the paper). The results follow an identical pattern as the CDA that used all 26 variables, although with marginally smaller effect sizes. A Pearson correlation between the CDA variates used in the main paper and the CDA variates using the reduced number of EEG variables were: Variate 1:  $r = .96$ ; Variate 2:  $r = .79$ ; Variate 3:  $r = .75$ . See table S12 and S13 for Jackknife results and the mean responses of each variate by group.

### **Supplemental Methods References:**

1. Tamminga CA, Ivleva EI, Keshavan MS, Pearlson GD, Clementz BA, Witte B, Morris DW, Bishop J, Thaker GK, Sweeney JA: Clinical Phenotypes of psychosis in the Bipolar-Schizophrenia Network on Intermediate Phenotypes (B-SNIP). *Am J Psychiatry* 2013; 170:1263–1274
2. First MB, Spitzer RL, Gibbon M, Williams JBW: Structured Clinical Interview for DSM-IV Axis I Disorders, Clinician Version (SCID-I-CV). 1997.
3. Lançon C, Auquier P, Nayt G, Reine G: Stability of the five-factor structure of the Positive and Negative Syndrome Scale (PANSS). *Schizophr Res* 2000;
4. Young RC, Biggs JT, Ziegler VE, Meyer DA: A rating scale for mania: Reliability, validity and sensitivity. *Br J Psychiatry* 1978;
5. Montgomery SA, Asberg M: A new depression scale designed to be sensitive to change. *Br J Psychiatry* 1979;
6. Birchwood MAX, Smith JO, Cochrane RAY, Wetton S, Copestake S: The Social Functioning Scale. The development and validation of a new scale of social adjustment for use in family intervention programmes with schizophrenic patients. *Br J Psychiatry* 1990; 853–860
7. Ethridge LE, Hamm JP, Pearlson GD, Tamminga CA, Sweeney JA, Keshavan MS, Clementz BA: Event-Related Potential and Time-Frequency Endophenotypes for Schizophrenia and Psychotic Bipolar Disorder. *Biol Psychiatry* 2015; 77:127–136
8. Clementz BA, Sweeney JA, Hamm JP, Ivleva EI, Ethridge LE, Pearlson GD, Keshavan MS, Tamminga CA: Identification of distinct psychosis biotypes using brain-based biomarkers. *Am J Psychiatry* 2016; 173:373–384
9. Benjamini Y, Hochberg Y: Benjamini Y, Hochberg Y. Controlling the false discovery rate: a practical and powerful approach to multiple testing. *J R Stat Soc.* 1995;B57:289–300. *J R Stat Soc B* 1995;
10. Hentschke H, Stüttgen MC: Computation of measures of effect size for neuroscience data sets. *Eur J Neurosci* 2011; 34:1887–1894
11. Rusticus SA, Lovato CY: Applying tests of equivalence for multiple group comparisons: Demonstration of the confidence interval approach. *Pract Assessment, Res Eval* 2011; 16:1–6
12. Parker DA, Hamm JP, McDowell JE, Keedy SK, Gershon ES, Ivleva EI, Pearlson GD, Keshavan MS, Tamminga CA, Sweeney JA, Clementz BA: Auditory steady-state EEG response across the schizo-bipolar spectrum. *Schizophr Res* 2019; 209:218–226
13. Parker DA, Trotti RL, McDowell JE, Keedy SK, Gershon ES, Ivleva EI, Pearlson GD, Keshavan MS, Tamminga CA, Sweeney JA, Clementz BA: Auditory paired-stimuli responses across the psychosis and bipolar spectrum and their relationship to clinical features. *Biomarkers in Neuropsychiatry* 2020; 3:100014
14. Ethridge LE, Hamm JP, Shapiro JR, Summerfelt AT, Keedy SK, Stevens MC, Pearlson G, Tamminga CA, Boutros NN, Sweeney JA, Keshavan MS, Thaker G, Clementz BA: Neural activations during auditory oddball processing discriminating schizophrenia and psychotic bipolar disorder. *Biol Psychiatry* 2012; 72:766–774
15. Delorme A, Makeig S: EEGLAB: An open source toolbox for analysis of single-trial EEG dynamics including independent component analysis. *J Neurosci Methods* 2004; 134:9–21
16. Dien J, Khoe W, Mangun GR: Evaluation of PCA and ICA of simulated ERPs: Promax vs. infomax rotations. *Hum Brain Mapp* 2007; 28:742–763
17. Venables NC, Bernat EM, Sponheim SR: Genetic and Disorder-Specific Aspects of Resting State EEG Abnormalities in Schizophrenia. *Schizophr Bull* 2009; 35:826–839
18. Mardia KV, Kent JT, Bibby JM: Multivariate Analysis. In: Probability and Mathematical Statistics. London: Academic Press; 1979.
19. Lawley D: Tests of significance in canonical analysis. *Biometrika* 1959; 46:59–66

## **Supplemental Tables:**

**Table S1: B-SNIP1 Sample Characteristics**

*B-SNIP1 Characteristics*

|                           | HC    | BDP   | SAD   | SZ    | Total | t-test comparing<br>averages of B-SNIP1 and<br>B-SNIP2 | <i>p</i> |
|---------------------------|-------|-------|-------|-------|-------|--------------------------------------------------------|----------|
| N                         | 223   | 174   | 134   | 218   | 749   |                                                        |          |
| Mean age                  | 37.37 | 35.68 | 36.52 | 34.53 | 36.00 | t(1758)=-2.43*                                         | .02      |
| Age SD                    | 12.31 | 12.90 | 12.32 | 12.44 | 12.51 |                                                        |          |
| Sex (% F)                 | 57    | 58    | 58    | 31    | 50    |                                                        |          |
| Illness duration          |       |       |       |       |       | t(1064)=-8.09***                                       | <.001    |
| Mean                      | N/A   | 16.46 | 15.77 | 13.72 | 15.15 |                                                        |          |
| SD                        | N/A   | 12.32 | 10.97 | 12.01 | 11.90 |                                                        |          |
| Years of Formal Education |       |       |       |       |       | t(1722)=-2.32*                                         | .02      |
| Mean                      | 15.23 | 14.26 | 13.13 | 12.83 | 13.93 |                                                        |          |
| SD                        | 2.57  | 2.36  | 2.19  | 2.22  | 2.56  |                                                        |          |
| Ethnicity                 |       |       |       |       |       |                                                        |          |
| (% Hispanic)              | 10    | 8     | 13    | 9     | 10    |                                                        |          |
| Race (%)                  |       |       |       |       |       |                                                        |          |
| AA                        | 24    | 18    | 33    | 44    | 30    |                                                        |          |
| AE                        | 0     | 0     | 0     | 0     | 0     |                                                        |          |

|                                          |        |        |        |        |        |                 |       |
|------------------------------------------|--------|--------|--------|--------|--------|-----------------|-------|
| AS                                       | 4      | 2      | 1      | 2      | 2      |                 |       |
| CA                                       | 67     | 77     | 60     | 50     | 63     |                 |       |
| NH                                       | 0      | 0      | 0      | 0      | 0      |                 |       |
| MR                                       | 2      | 1      | 5      | 3      | 3      |                 |       |
| OT/UNK                                   | 2      | 2      | 1      | 2      | 2      |                 |       |
| Global Assessment of Function (GAF)      |        |        |        |        |        | t(1626)=-1.70   | .09   |
| N                                        | 219    | 173    | 132    | 217    | 741    |                 |       |
| M                                        | 86.89  | 60.99  | 49.24  | 49.34  | 63.14  |                 |       |
| SD                                       | 6.37   | 12.47  | 11.96  | 12.16  | 19.36  |                 |       |
| Birchwood Social Functioning Scale (SFS) |        |        |        |        |        | t(1492)=-.13    | .90   |
| N                                        | 157    | 135    | 107    | 166    | 565    |                 |       |
| M                                        | 157.18 | 134.04 | 120.00 | 122.76 | 134.50 |                 |       |
| SD                                       | 16.51  | 22.64  | 25.27  | 24.24  | 26.70  |                 |       |
| BACS Verbal Memory                       |        |        |        |        |        | t(1673)=3.81*** | <.001 |
| N                                        | 216    | 171    | 130    | 208    | 725    |                 |       |
| M                                        | -.12   | -.42   | -1.08  | -1.02  | -.62   |                 |       |
| SD                                       | 1.11   | 1.25   | 1.38   | 1.34   | 1.33   |                 |       |
| BACS Digit Sequencing                    |        |        |        |        |        | t(1672)=.92     | .36   |
| M                                        | -.13   | -.51   | -.92   | -1.31  | -.70   |                 |       |
| SD                                       | 1.13   | 1.08   | 1.16   | 1.12   | 1.22   |                 |       |
| BACS Token Motor                         |        |        |        |        |        | t(1642)=5.01*** | <.001 |
| M                                        | 0.00   | -.88   | -1.35  | -1.33  | -.83   |                 |       |

|                                                       |      |       |       |       |       |                |     |
|-------------------------------------------------------|------|-------|-------|-------|-------|----------------|-----|
| SD                                                    | 1.05 | 1.21  | 1.10  | 1.23  | 1.28  |                |     |
| BACS Verbal Fluency                                   |      |       |       |       |       | t(1669)=-.69   | .49 |
| M                                                     | .13  | -.17  | -.55  | -.81  | -.33  |                |     |
| SD                                                    | 1.05 | 1.19  | 1.21  | 1.13  | 1.20  |                |     |
| BACS Symbol Coding                                    |      |       |       |       |       | t(1672)=-2.33* | .02 |
| M                                                     | .05  | -.92  | -1.41 | -1.44 | -.87  |                |     |
| SD                                                    | 1.04 | 1.09  | 1.13  | 1.10  | 1.25  |                |     |
| BACS Tower of London                                  |      |       |       |       |       | t(1672)=1.15   | .25 |
| M                                                     | .03  | -.15  | -.70  | -.80  | -.38  |                |     |
| SD                                                    | 1.12 | 1.09  | 1.28  | 1.45  | 1.30  |                |     |
| Positive and Negative Syndrome Scale (PANSS) Positive |      |       |       |       |       | t(1045)=-2.59* | .01 |
| N                                                     | N/A  | 171   | 132   | 211   | 514   |                |     |
| M                                                     | N/A  | 12.55 | 17.53 | 16.95 | 15.64 |                |     |
| SD                                                    | N/A  | 4.33  | 5.04  | 5.48  | 5.46  |                |     |
| PANSS Negative                                        |      |       |       |       |       | t(1044)=-2.63* | .01 |
| N                                                     | N/A  | 171   | 132   | 211   | 514   |                |     |
| M                                                     | N/A  | 12.19 | 15.59 | 16.84 | 14.97 |                |     |
| SD                                                    | N/A  | 3.98  | 5.01  | 5.75  | 5.41  |                |     |
| PANSS General                                         |      |       |       |       |       | t(1046)=-.51   | .61 |
| N                                                     | N/A  | 171   | 132   | 212   | 515   |                |     |
| M                                                     | N/A  | 28.58 | 34.47 | 32.97 | 31.90 |                |     |
| SD                                                    | N/A  | 8.04  | 8.62  | 8.82  | 8.84  |                |     |



|                                                   |     |       |       |       |       |                  |       |
|---------------------------------------------------|-----|-------|-------|-------|-------|------------------|-------|
| PANSS Total                                       |     |       |       |       |       | t(1043)=-1.97*   | .049  |
| N                                                 | N/A | 171   | 132   | 210   | 513   |                  |       |
| M                                                 | N/A | 53.32 | 67.59 | 66.72 | 62.48 |                  |       |
| SD                                                | N/A | 13.81 | 16.00 | 16.96 | 16.98 |                  |       |
| Montgomery-Åsberg Depression Rating Scale (MADRS) |     |       |       |       |       | t(1049)=-3.08**  | .002  |
| N                                                 | N/A | 170   | 131   | 209   | 510   |                  |       |
| M                                                 | N/A | 10.59 | 14.08 | 8.66  | 10.69 |                  |       |
| SD                                                | N/A | 9.60  | 10.18 | 7.92  | 9.35  |                  |       |
| Young Mania Rating Scale (YMRS)                   |     |       |       |       |       | t(1050)=-9.73*** | <.001 |
| N                                                 | N/A | 171   | 131   | 210   | 512   |                  |       |
| M                                                 | N/A | 5.11  | 6.55  | 5.71  | 5.73  |                  |       |
| SD                                                | N/A | 5.75  | 6.22  | 5.64  | 5.85  |                  |       |

*Note.* SZ = schizophrenia, SAD = schizoaffective disorder, BDP = bipolar I disorder with psychotic features.

\* $p < .05$ , \*\* $p < .01$ , \*\*\* $p < .001$ . t-tests were performed excluding the BDNP sample from B-SNIP2.

**Table S2: Group EEG Values (Age-corrected Standardized Voltage) and Effect sizes relative to the Healthy comparison group.**

|                                                       | Average<br>F-Value<br>(4,1068) | HC     |      | BDNP   |      | BDP    |      | SAD    |      | SZ     |     | Glass Delta |       |       |       |
|-------------------------------------------------------|--------------------------------|--------|------|--------|------|--------|------|--------|------|--------|-----|-------------|-------|-------|-------|
|                                                       |                                | Mean   | STD  | Mean   | STD  | Mean   | STD  | Mean   | STD  | Mean   | STD |             |       |       |       |
| Standards<br>ERP P50<br>(60-80<br>ms)                 | 3.62                           | -.089  | .76  | .341   | .92  | -.018  | .71  | .005   | .74  | .035   | .88 | .569        | .095  | .124  | .165  |
| Standards<br>ERP N100<br>(80-140<br>ms)               | 14.23                          | -1.636 | .91  | -1.399 | .96  | -1.458 | .97  | -1.094 | .93  | -1.162 | .93 | .260        | .195  | .594  | .519  |
| Standards<br>ERP<br>Rising<br>P200<br>(140-200<br>ms) | 6.69                           | .842   | 1.14 | .677   | 1.02 | .451   | 1.03 | .880   | 1.09 | .893   | .90 | -.144       | -.341 | .034  | .045  |
| Standards<br>ERP Late<br>P200<br>(200-280<br>ms)      | 9.50                           | 1.282  | .97  | .976   | .90  | 1.044  | .81  | .882   | .86  | .871   | .73 | -.314       | -.244 | -.410 | -.421 |
| Standards<br>ERP Late<br>(520-600<br>ms)              | 3.11                           | .100   | .44  | -.066  | .43  | .034   | .40  | -.001  | .37  | .009   | .40 | -.379       | -.151 | -.230 | -.207 |
| Standards<br>LOW<br>Early/Mid<br>(20-340<br>ms)       | 1.18                           | .869   | .54  | .818   | .51  | .685   | .49  | .585   | .55  | .585   | .52 | -.095       | -.342 | -.530 | -.530 |
| Standards<br>BETA<br>Early (20-<br>160 ms)            | 5.85                           | 1.231  | .70  | 1.285  | .73  | .993   | .64  | .932   | .72  | .967   | .76 | .077        | -.341 | -.427 | -.377 |

|                                                       |      |  |       |      |       |      |       |      |       |     |       |      |  |       |       |       |       |
|-------------------------------------------------------|------|--|-------|------|-------|------|-------|------|-------|-----|-------|------|--|-------|-------|-------|-------|
| Standards<br>GAMMA<br>Early (20-<br>100 ms)           | 5.38 |  | 1.444 | .88  | 1.649 | 1.01 | 1.106 | .92  | 1.198 | .95 | 1.227 | 1.03 |  | .232  | -.383 | -.279 | -.246 |
| Standards<br>GAMMA<br>Mid (180-<br>200 ms)            | 3.48 |  | -.257 | .73  | -.011 | .75  | -.117 | .75  | -.130 | .84 | -.085 | .87  |  | .337  | .191  | .174  | .235  |
| Standards<br>GAMMA<br>Mid-2<br>(220-260<br>ms)        | 3.89 |  | -.331 | .72  | -.078 | .80  | -.227 | .74  | -.181 | .86 | -.125 | .85  |  | .350  | .145  | .208  | .286  |
| Targets<br>Frontal<br>ERP N100<br>(80-140<br>ms)      | 8.60 |  | -.768 | .64  | -.667 | .69  | -.578 | .60  | -.461 | .65 | -.518 | .67  |  | .158  | .298  | .483  | .393  |
| Targets<br>Frontal<br>ERP<br>P2/N2<br>(140-240<br>ms) | 6.18 |  | .337  | .87  | .535  | .83  | .229  | .87  | .649  | .77 | .466  | .74  |  | .227  | -.123 | .357  | .148  |
| Targets<br>Frontal<br>ERP P3a<br>(280-360<br>ms)      | 5.67 |  | .629  | 1.17 | .131  | .97  | .291  | 1.03 | .335  | .93 | .359  | .96  |  | -.425 | -.288 | -.251 | -.230 |
| Targets<br>Frontal<br>ERP Late<br>(420-580<br>ms)     | 5.33 |  | -.589 | .77  | -.702 | .91  | -.641 | .79  | -.421 | .76 | -.314 | .70  |  | -.146 | -.067 | .218  | .356  |
| Targets<br>Parietal<br>ERP N100<br>(60-140<br>ms)     | 4.75 |  | -.846 | .44  | -.778 | .43  | -.871 | .42  | -.743 | .37 | -.712 | .36  |  | .156  | -.058 | .235  | .308  |

|                                                              |       |  |       |      |       |      |       |     |       |      |       |     |       |       |       |       |
|--------------------------------------------------------------|-------|--|-------|------|-------|------|-------|-----|-------|------|-------|-----|-------|-------|-------|-------|
| Targets<br>Parietal<br>ERP N200<br>(140-260<br>ms)           | 13.16 |  | -866  | .63  | -573  | .59  | -777  | .56 | -537  | .56  | -499  | .50 | .468  | .143  | .525  | .586  |
| Targets<br>Parietal<br>ERP Early<br>P300b<br>(320-420<br>ms) | 9.47  |  | 1.241 | 1.00 | 1.018 | .97  | .956  | .95 | .772  | .81  | .867  | .81 | -.222 | -.284 | -.467 | -.373 |
| Targets<br>Parietal<br>ERP Late<br>P300b<br>(420-600<br>ms)  | 5.52  |  | .701  | .71  | .633  | .66  | .514  | .69 | .450  | .66  | .438  | .57 | -.096 | -.262 | -.352 | -.369 |
| Targets<br>LOW<br>Early (40-<br>160 ms)                      | 6.22  |  | .742  | .67  | .736  | .70  | .533  | .65 | .518  | .68  | .445  | .73 | -.009 | -.311 | -.335 | -.443 |
| Targets<br>LOW<br>Mid (160-<br>300 ms)                       | 15.14 |  | .928  | .73  | .685  | .78  | .627  | .68 | .544  | .75  | .437  | .78 | -.333 | -.414 | -.528 | -.675 |
| Targets<br>LOW<br>Late (<br>300-440<br>ms)                   | 12.92 |  | .396  | .73  | .231  | .70  | .141  | .63 | .053  | .66  | -.003 | .68 | -.227 | -.350 | -.471 | -.548 |
| Targets<br>BETA<br>Mid (140-<br>220 ms)                      | 4.34  |  | .548  | .87  | .621  | 1.02 | .378  | .79 | .262  | .83  | .336  | .80 | .085  | -.196 | -.330 | -.244 |
| Targets<br>BETA<br>Late (420-<br>560 ms)                     | 4.26  |  | -.609 | .76  | -.577 | .82  | -.493 | .76 | -.397 | .85  | -.379 | .85 | .043  | .153  | .279  | .303  |
| Targets<br>GAMMA                                             | 3.44  |  | -.067 | .83  | .234  | .99  | .078  | .88 | .056  | 1.00 | .131  | .97 | .365  | .176  | .149  | .239  |

|                                           |       |  |       |      |       |      |       |      |       |     |       |      |  |       |       |        |        |
|-------------------------------------------|-------|--|-------|------|-------|------|-------|------|-------|-----|-------|------|--|-------|-------|--------|--------|
| Mid (140-180 ms)                          |       |  |       |      |       |      |       |      |       |     |       |      |  |       |       |        |        |
| Targets<br>GAMMA<br>Mid-2<br>(240-280 ms) | 2.91  |  | -.185 | .91  | .111  | 1.01 | -.081 | .88  | -.029 | .98 | -.004 | 1.06 |  | .324  | .113  | .171   | .198   |
| Targets<br>GAMMA<br>Late (340-600 ms)     | 3.71  |  | -.309 | .82  | -.077 | .93  | -.116 | .84  | -.118 | .97 | -.078 | .98  |  | .283  | .236  | .233   | .282   |
| CDA<br>Variate 1:                         | 75.48 |  | .528  | .94  | .002  | .76  | .062  | .90  | -.572 | .82 | -.510 | .83  |  | -.556 | -.493 | -1.164 | -1.099 |
| CDA<br>Variate 2:                         | 18.34 |  | .027  | 1.00 | .846  | .99  | -.414 | .97  | -.034 | .84 | .048  | .98  |  | .818  | -.440 | -.060  | .021   |
| CDA<br>Variate 3:                         | 12.84 |  | .129  | .99  | -.503 | .99  | -.376 | 1.04 | .125  | .98 | .084  | .89  |  | -.641 | -.512 | -.003  | -.045  |

**Table S3: Post-Hoc comparisons for each EEG and CDA variable:**

| <b>Tukey's B Homogenous Subgroups</b>         |                                         |
|-----------------------------------------------|-----------------------------------------|
| Standards ERP P50 (60-80 ms)                  | HC/BDP/SAD/SZ < BDNP                    |
| Standards ERP N100 (80-140 ms)                | HC/BDP/BDNP < BDNP/SZ < SZ/SAD          |
| Standards ERP Rising P200 (140-200 ms)        | BDP/BDNP < BDNP/HC/SAD/SZ               |
| Standards ERP Late P200 (200-280 ms)          | SZ/SAD/BDNP/BDP < HC                    |
| Standards ERP Late (520-600 ms)               | BDNP/SAD/SZ/BDP < SAD/SZ/BDP/HC         |
| Standards LOW Early/Mid (20-340 ms)           | SADSZ/BDP < BDP/BDNP < BDNP/HC          |
| Standards BETA Early (20-160 ms)              | SAD/SZ/BDP < HC/BDNP                    |
| Standards GAMMA Early (20-100 ms)             | BDP/SAD/SZ < SAD/SZ/HC < HC/BDNP        |
| Standards GAMMA Mid (180-200 ms)              | HC/SAD/BDP/SZ/BDNP                      |
| Standards GAMMA Mid-2 (220-260 ms)            | HC/BDP/SAD/SZ < BDP/SAD/SZ/BDNP         |
| Targets Frontal ERP N100 (80-140 ms)          | HC/BDNP < BDNP/BDP/SZ < BDP/SZ/SAD      |
| Targets Frontal ERP P2/N2 (140-240 ms)        | BDP/HC/SZ < HC/SZ/BDNP < SZ/BDNP/SAD    |
| Targets Frontal ERP P3a (280-360 ms)          | BDNP/BDP/SAD/SZ < SAD/SZ/HC             |
| Targets Frontal ERP Late (420-580 ms)         | BDNP/BDP/HC < BDP/HC/SAD < SAD/SZ       |
| Targets Parietal ERP N100 (60-140 ms)         | BDP/HC/BDNP < HC/BDNP/SAD < BDNP/SAD/SZ |
| Targets Parietal ERP N200 (140-260 ms)        | HC/BDP < BDNP/SAD/SZ                    |
| Targets Parietal ERP Early P300b (320-420 ms) | SAD/SZ/BDP/BDNP > BDNP/HC               |
| Targets Parietal ERP Late P300b (420-600 ms)  | SZ/SAD/BDP/BDNP < BDP/BDNP/HC           |
| Targets LOW Early (40-160 ms)                 | SZ/SAD/BDP < BDNP/HC                    |
| Targets LOW Mid (160-300 ms)                  | SZ/SAD/BDP < SAD/BDP/BDNP < HC          |

|                                  |                                      |
|----------------------------------|--------------------------------------|
| Targets LOW Late ( 300-440 ms)   | SZ/SAD/BDP < SAD/BDP/BDNP < BDNP/HC  |
| Targets BETA Mid (140-220 ms)    | SAD/SZ/BDP < SZ/BDP/HC < BDP/HC/BDNP |
| Targets BETA Late (420-560 ms)   | HC/BDNP/BDP/SAD/SZ                   |
| Targets GAMMA Mid (140-180 ms)   | HC/SAD/BDP/SZ < SAD/BDP/SZ/BDNP      |
| Targets GAMMA Mid-2 (240-280 ms) | HC/BDP/SAD/SZ/BDNP                   |
| Targets GAMMA Late (340-600 ms)  | HC/SAD/BDP/SZ/BDNP                   |
| CDA Variate 1:                   | HC < BDP/BDNP < SZ/SAD               |
| CDA Variate 1:                   | BDP < SAD/HC/SZ < BDNP               |
| CDA Variate 1:                   | BDNP/BDP < SZ/SAD/HC                 |

**Table S4: CDA Results and Structure Matrix:**

| <b>Function</b>                        | <b>Eigenvalue</b>    | <b>% of Variance</b> | <b>Canonical Correlation</b> |              |              |
|----------------------------------------|----------------------|----------------------|------------------------------|--------------|--------------|
| CDA-1                                  | .288                 | 64.5                 | .473                         |              |              |
| CDA-2                                  | .078                 | 17.4                 | .268                         |              |              |
| CDA-3                                  | .051                 | 11.5                 | .221                         |              |              |
| <b>Test of Function(s)</b>             | <b>Wilks' Lambda</b> | <b>Chi-square</b>    | <b>df</b>                    | <b>Sig.</b>  |              |
| 1 through 4                            | .666                 | 431.339              | 104                          | <.001        |              |
| 2 through 4                            | .858                 | 163.018              | 75                           | <.001        |              |
| 3 through 4                            | .924                 | 83.745               | 48                           | .001         |              |
| <b><u>CDA Structure Matrix:</u></b>    |                      |                      | <b>CDA-1</b>                 | <b>CDA-2</b> | <b>CDA-3</b> |
| Standards ERP P50 (60-80 ms)           |                      |                      | -.113                        | .311         | -.335        |
| Standards ERP N100 (80-140 ms)         |                      |                      | -.452                        | .027         | .066         |
| Standards ERP Rising P200 (140-200 ms) |                      |                      | -.05                         | .219         | .569         |
| Standards ERP Late P200 (200-280 ms)   |                      |                      | .378                         | -.027        | .161         |
| Standards ERP Late (520-600 ms)        |                      |                      | .19                          | -.148        | .249         |
| Standards LOW Early/Mid (20-340 ms)    |                      |                      | .44                          | .213         | .033         |
| Standards BETA Early (20-160 ms)       |                      |                      | .322                         | .335         | .027         |
| Standards GAMMA Early (20-100 ms)      |                      |                      | .193                         | .458         | .091         |
| Standards GAMMA Mid (180-200 ms)       |                      |                      | -.153                        | .076         | -.252        |
| Standards GAMMA Mid-2 (220-260 ms)     |                      |                      | -.186                        | .125         | -.175        |



|                                              |       |       |       |
|----------------------------------------------|-------|-------|-------|
| Targets Frontal ERP N100 (80-140 ms)         | -.352 | -.139 | -.088 |
| Targets BETA Late (420-560 ms)               | -.227 | -.084 | .027  |
| Targets Frontal ERP P2/N2 (140-240 ms)       | -.23  | .27   | .24   |
| Targets Frontal ERP P3a (280-360 ms)         | .213  | -.056 | .454  |
| Targets Frontal ERP Late (420-580 ms)        | -.245 | -.013 | .399  |
| Targets Parietal ERP N100 (60-140 ms)        | -.248 | .193  | .205  |
| Targets Parietal ERP N200 (140-260 ms)       | -.502 | .253  | -.007 |
| Targets Parietal ERP Early P300 (320-420 ms) | .373  | .094  | .137  |
| Targets Parietal ERP Late P300 (420-600 ms)  | .313  | .154  | .082  |
| Targets LOW Early (40-160 ms)                | .31   | .233  | .064  |
| Targets LOW Late (300-440 ms)                | .437  | .124  | .152  |
| Targets LOW Mid (160-300 ms)                 | .483  | .087  | .213  |
| Targets BETA Mid (140-220 ms)                | .241  | .232  | -.06  |
| Targets GAMMA Mid (140-180 ms)               | -.142 | .107  | -.255 |
| Targets GAMMA Mid-2 (240-280 ms)             | -.143 | .13   | -.177 |
| Targets GAMMA Late (340-600 ms)              | -.19  | .006  | -.228 |

**Table S5: CCA Cognition Structure Matrix**

| <b>COGNITION</b>       |     | <b>NEURAL</b>                                |      |
|------------------------|-----|----------------------------------------------|------|
| BACS: Verbal Memory    | .70 | Standards ERP P50 (60-80 ms)                 | -.23 |
| BACS: Digit Sequencing | .65 | Standards ERP N100 (80-140 ms)               | -.52 |
| BACS: Token Motor      | .64 | Standards ERP Rising P200 (140-200 ms)       | -.02 |
| BACS: Verbal Fluency   | .60 | Standards ERP Late P200 (200-280 ms)         | .33  |
| BACS: Symbol Coding    | .89 | Standards ERP Late (520-600 ms)              | .16  |
| BACS: Tower of London  | .68 | Standards LOW Early/Mid (20-340 ms)          | .54  |
|                        |     | Standards BETA Early (20-160 ms)             | .32  |
|                        |     | Standards GAMMA Early (20-100 ms)            | .10  |
|                        |     | Standards GAMMA Mid (180-200 ms)             | -.29 |
|                        |     | Standards GAMMA Mid-2 (220-260 ms)           | -.28 |
|                        |     | Targets Frontal ERP N100 (80-140 ms)         | -.42 |
|                        |     | Targets Frontal ERP P2/N2 (140-240 ms)       | -.25 |
|                        |     | Targets Frontal ERP P3a (280-360 ms)         | .26  |
|                        |     | Targets Frontal ERP Late (420-580 ms)        | -.27 |
|                        |     | Targets Parietal ERP N100 (60-140 ms)        | -.42 |
|                        |     | Targets Parietal ERP N200 (140-260 ms)       | -.49 |
|                        |     | Targets Parietal ERP Early P300 (320-420 ms) | .48  |
|                        |     | Targets Parietal ERP Late P300 (420-600 ms)  | .44  |
|                        |     | Targets LOW Early (40-160 ms)                | .46  |
|                        |     | Targets LOW Mid (160-300 ms)                 | .63  |

|                                  |      |
|----------------------------------|------|
| Targets LOW Late ( 300-440 ms)   | .62  |
| Targets BETA Mid (140-220 ms)    | .21  |
| Targets BETA Late (420-560 ms)   | -.19 |
| Targets GAMMA Mid (140-180 ms)   | -.26 |
| Targets GAMMA Mid-2 (240-280 ms) | -.24 |
| Targets GAMMA Late (340-600 ms)  | -.31 |

**Table S6: CCA Clinical Structure Matrix**

| CLINICAL           |      | NEURAL                                       |      |
|--------------------|------|----------------------------------------------|------|
| PANSS Positive     | -.34 | Standards ERP P50 (60-80 ms)                 | -.13 |
| PANSS Negative     | -.34 | Standards ERP N100 (80-140 ms)               | .24  |
| PANSS General      | .12  | Standards ERP Rising P200 (140-200 ms)       | .46  |
| MADRS              | .48  | Standards ERP Late P200 (200-280 ms)         | -.05 |
| YOUNG MANIA        | .23  | Standards ERP Late (520-600 ms)              | .15  |
| Social Functioning | .36  | Standards LOW Early/Mid (20-340 ms)          | -.31 |
|                    |      | Standards BETA Early (20-160 ms)             | -.16 |
|                    |      | Standards GAMMA Early (20-100 ms)            | .03  |
|                    |      | Standards GAMMA Mid (180-200 ms)             | .19  |
|                    |      | Standards GAMMA Mid-2 (220-260 ms)           | .14  |
|                    |      | Targets Frontal ERP N100 (80-140 ms)         | .34  |
|                    |      | Targets Frontal ERP P2/N2 (140-240 ms)       | .14  |
|                    |      | Targets Frontal ERP P3a (280-360 ms)         | .16  |
|                    |      | Targets Frontal ERP Late (420-580 ms)        | .51  |
|                    |      | Targets Parietal ERP N100 (60-140 ms)        | .36  |
|                    |      | Targets Parietal ERP N200 (140-260 ms)       | .29  |
|                    |      | Targets Parietal ERP Early P300 (320-420 ms) | -.35 |
|                    |      | Targets Parietal ERP Late P300 (420-600 ms)  | -.32 |
|                    |      | Targets LOW Early (40-160 ms)                | -.16 |
|                    |      | Targets LOW Mid (160-300 ms)                 | -.20 |
|                    |      | Targets LOW Late (300-440 ms)                | -.23 |

|                                  |     |
|----------------------------------|-----|
| Targets BETA Mid (140-220 ms)    | .03 |
| Targets BETA Late (420-560 ms)   | .24 |
| Targets GAMMA Mid (140-180 ms)   | .15 |
| Targets GAMMA Mid-2 (240-280 ms) | .09 |
| Targets GAMMA Late (340-600 ms)  | .08 |

**Table S7: Medications Associations**

|                                        | Antipsychotics |      | Antidepressants |      | Lithium |      | Anticonvulsants |      | Stimulants |      | Anxiolytics |      |
|----------------------------------------|----------------|------|-----------------|------|---------|------|-----------------|------|------------|------|-------------|------|
|                                        | r              | p    | r               | p    | r       | p    | r               | p    | r          | p    | r           | p    |
| Standards ERP P50 (60-80 ms)           | -.057          | .148 | .096*           | .015 | .032    | .422 | -.034           | .384 | -.001      | .977 | .016        | .691 |
| Standards ERP N100 (80-140 ms)         | .114**         | .004 | .062            | .118 | .072    | .069 | .013            | .734 | -.059      | .139 | .033        | .405 |
| Standards ERP Rising P200 (140-200 ms) | .049           | .213 | -.063           | .110 | .055    | .161 | .025            | .532 | -.009      | .825 | -.024       | .544 |
| Standards ERP Late P200 (200-280 ms)   | -.153**        | .000 | -.067           | .090 | .046    | .246 | -.069           | .081 | .003       | .940 | -.095*      | .016 |
| Standards ERP Late (520-600 ms)        | -.039          | .321 | -.081*          | .041 | -.006   | .886 | -.021           | .593 | -.043      | .278 | -.074       | .060 |
| Standards LOW Early/Mid (20-340 ms)    | -.064          | .108 | .020            | .606 | .066    | .096 | .013            | .751 | .078*      | .048 | .044        | .262 |
| Standards BETA Early (20-160 ms)       | -.028          | .475 | .027            | .501 | .047    | .237 | -.010           | .795 | .092*      | .020 | .081*       | .041 |
| Standards GAMMA Early (20-100 ms)      | .016           | .689 | .027            | .499 | .017    | .676 | .002            | .968 | .065       | .098 | .037        | .352 |
| Standards GAMMA Mid (180-200 ms)       | -.040          | .312 | .008            | .847 | .023    | .565 | .004            | .921 | .014       | .723 | .004        | .912 |
| Standards GAMMA Mid-2 (220-260 ms)     | -.028          | .475 | .009            | .827 | .022    | .570 | .013            | .748 | -.023      | .555 | -.055       | .167 |
| Targets Frontal ERP N100 (80-140 ms)   | .069           | .080 | .046            | .245 | -.001   | .972 | -.030           | .450 | -.056      | .155 | -.022       | .586 |
| Targets BETA Late (420-560 ms)         | .069           | .083 | .097*           | .014 | .032    | .413 | .008            | .846 | -.009      | .813 | .049        | .219 |
| Targets Frontal ERP P2/N2 (140-240 ms) | -.006          | .888 | -.119**         | .003 | .045    | .260 | -.081*          | .040 | -.013      | .738 | -.010       | .791 |
| Targets Frontal ERP P3a (280-360 ms)   | .138**         | .000 | -.044           | .264 | -.049   | .213 | .015            | .706 | -.003      | .936 | .019        | .627 |

|                                              |        |      |       |      |        |      |        |      |        |      |       |      |
|----------------------------------------------|--------|------|-------|------|--------|------|--------|------|--------|------|-------|------|
| Targets Frontal ERP Late (420-580 ms)        | .098*  | .013 | -.051 | .195 | -.070  | .076 | .108** | .006 | -.018  | .658 | -.042 | .291 |
| Targets Parietal ERP N100 (60-140 ms)        | .188** | .000 | -.016 | .695 | -.074  | .061 | .100*  | .011 | .029   | .470 | .085* | .031 |
| Targets Parietal ERP N200 (140-260 ms)       | -.026  | .517 | -.022 | .570 | .055   | .162 | -.062  | .116 | .045   | .252 | .018  | .640 |
| Targets Parietal ERP Early P300 (320-420 ms) | -.035  | .381 | .020  | .607 | .115** | .003 | -.035  | .378 | .013   | .747 | .047  | .238 |
| Targets Parietal ERP Late P300 (420-600 ms)  | -.044  | .271 | .007  | .851 | .062   | .116 | .016   | .689 | .121** | .002 | .061  | .121 |
| Targets LOW Early (40-160 ms)                | -.066  | .097 | .007  | .855 | .050   | .205 | -.043  | .277 | .077   | .051 | .030  | .445 |
| Targets LOW Late (300-440 ms)                | -.075  | .058 | -.015 | .696 | .080*  | .044 | -.023  | .567 | .072   | .069 | .017  | .671 |
| Targets LOW Mid (160-300 ms)                 | -.051  | .197 | -.027 | .499 | .079*  | .045 | -.029  | .465 | .087*  | .028 | .078* | .049 |
| Targets BETA Mid (140-220 ms)                | .044   | .262 | -.045 | .250 | .015   | .704 | .024   | .545 | .055   | .168 | .056  | .153 |
| Targets GAMMA Mid (140-180 ms)               | -.051  | .200 | .000  | .992 | .051   | .200 | -.014  | .720 | -.012  | .760 | -.047 | .231 |
| Targets GAMMA Mid-2 (240-280 ms)             | -.023  | .569 | .022  | .574 | .052   | .191 | -.019  | .639 | -.032  | .416 | -.019 | .630 |
| Targets GAMMA Late (340-600 ms)              | -.041  | .302 | .021  | .603 | .036   | .366 | -.022  | .572 | -.034  | .395 | -.028 | .476 |

---

*Note.* Uncorrected Spearman correlations with on/off status and EEG measures. \* $p < .05$ , \*\*  $p < .01$  two tailed

---

**Table S8: Medication details by group**

|                               | HC   | SZ   | SAD  | BDP  | BDNP |
|-------------------------------|------|------|------|------|------|
| % with medication information | 99   | 96   | 99   | 98   | 99   |
| % on any medication           | 48   | 88   | 93   | 91   | 91   |
| Total medication count- mean  | 1.11 | 3.99 | 4.78 | 4.61 | 5.11 |
| Total medication count- SD    | 1.66 | 2.89 | 3.49 | 3.89 | 4.00 |
| Psychotropic count- mean      | .07  | 2.22 | 2.66 | 2.73 | 2.78 |
| Psychotropic count- SD        | .35  | 1.44 | 1.66 | 1.99 | 1.62 |
| % on psychotropic medication  | 6    | 88   | 90   | 88   | 92   |
| % on antipsychotic            | 0    | 84   | 79   | 65   | 39   |
| % on first generation AP      | 0    | 21   | 14   | 1    | 2    |
| % on second generation AP     | 0    | 72   | 71   | 65   | 39   |
| % on antidepressant           | 3    | 43   | 52   | 44   | 60   |
| % on tricyclic                | 0    | 1    | 2    | 2    | 9    |
| % on MAOI                     | 0    | 0    | 0    | 0    | 2    |
| % on SSRI                     | 2    | 32   | 40   | 26   | 34   |
| % on other antidepressant     | 1    | 19   | 22   | 29   | 35   |
| % on mood stabilizer          | 1    | 22   | 46   | 65   | 68   |



|                                       |   |    |    |    |    |
|---------------------------------------|---|----|----|----|----|
| % on lithium                          | 0 | 5  | 12 | 23 | 26 |
| % on anticonvulsant                   | 1 | 18 | 40 | 50 | 51 |
| % on anxiolytic/sedative/hypnotic     | 2 | 15 | 21 | 28 | 37 |
| % on anticholinergic/antiparkinsonian | 0 | 22 | 16 | 3  | 2  |
| % on stimulant                        | 1 | 1  | 5  | 6  | 11 |
| % on other psychotropic               | 0 | 6  | 6  | 10 | 15 |

---

**Table S9***Differences in medication status between clinical groups*

|                                      | Statistic                 | <i>p</i> |
|--------------------------------------|---------------------------|----------|
| Total medications                    | F(3) = 2.64*              | .048     |
| Total psychotropic medications       | F(3) = 4.12**             | .007     |
| On antipsychotic                     | $\chi^2(3) = 6.55^{***}$  | <.001    |
| On antidepressant                    | $\chi^2(3) = 8.53^*$      | .04      |
| On SSRI                              | $\chi^2(3) = 9.09^*$      | .03      |
| On mood stabilizer                   | $\chi^2(3) = 85.83^{***}$ | <.001    |
| On lithium                           | $\chi^2(3) = 36.51^{***}$ | <.001    |
| On anticonvulsant                    | $\chi^2(3) = 52.87^{***}$ | <.001    |
| On anxiolytic/sedative/hypnotic      | $\chi^2(3) = 18.58^{***}$ | <.001    |
| On anticholinergic/ antiparkinsonian | $\chi^2(3) = 37.93^{***}$ | <.001    |

*Note.* \**p* < .05, \*\**p* <.01, \*\*\**p* < .001.

**Table S10***Lithium dosage information by clinical group*

|                        | SZ     | SAD    | BDP     | BDNP   | F(3) | <i>p</i> |
|------------------------|--------|--------|---------|--------|------|----------|
| N on lithium with data | 7      | 18     | 31      | 13     |      |          |
| Mean dose              | 678.57 | 822.78 | 922.58  | 865.38 | .74  | .53      |
| Dose SD                | 513.04 | 34.39  | 446.484 | 352.60 |      |          |

---

*Note.* Doses are reported in mg/day.

**Table S11***Chlorpromazine (CPZ) dose equivalents by clinical group*

|                               | SZ      | SAD    | BDP    | BDNP   | F(3) | <i>p</i> |
|-------------------------------|---------|--------|--------|--------|------|----------|
| N on antipsychotics with data | 143     | 138    | 87     | 19     |      |          |
| Mean dose                     | 725.06  | 595.72 | 298.94 | 264.53 | 3.69 | .01      |
| Dose SD                       | 1217.15 | 116.95 | 284.18 | 275.14 |      |          |

---

*Note.* Doses are reported in mg/day.

**Table S12***Jackknife Stepwise Linear Discriminant (95% of the sample)*

| <b>EEG Variables</b>                          | <b>Number of times in STEPWISE<br/>(1000 Iterations:<br/>95% of Sample)</b> | <b>Percentage in<br/>Stepwise<br/>Iterations</b> | <b>Average F-<br/>Value</b> |
|-----------------------------------------------|-----------------------------------------------------------------------------|--------------------------------------------------|-----------------------------|
| <b>Standards ERP Late P200 (200-280 ms)</b>   | 1000                                                                        | 100                                              | 5.88                        |
| <b>Targets Frontal ERP P2/N2 (140-240 ms)</b> | 1000                                                                        | 100                                              | 9.61                        |
| <b>Targets Parietal ERP N200 (140-260 ms)</b> | 1000                                                                        | 100                                              | 18.59                       |
| <b>Targets BETA Mid (140-220 ms)</b>          | 1000                                                                        | 100                                              | 5.92                        |
| <b>Targets BETA Late (420-560 ms)</b>         | 1000                                                                        | 100                                              | 10.24                       |
| <b>Targets LOW Mid (160-300 ms)</b>           | 998                                                                         | 99.8                                             | 8.30                        |
| <b>Standards ERP Rising P200 (140-200 ms)</b> | 991                                                                         | 99.1                                             | 5.31                        |
| <b>Standards ERP P50 (60-80 ms)</b>           | 760                                                                         | 76                                               | 3.06                        |
| <b>Standards GAMMA Early (20-100 ms)</b>      | 610                                                                         | 61                                               | 3.79                        |
| <b>Standards BETA Early (20-160 ms)</b>       | 582                                                                         | 58.2                                             | 7.76                        |
| Standards LOW Early/Mid (20-340 ms)           | 456                                                                         | 45.6                                             | 13.04                       |
| Targets Frontal ERP N100 (80-140 ms)          | 358                                                                         | 35.8                                             | 2.75                        |
| Standards ERP N100 (80-140 ms)                | 265                                                                         | 26.5                                             | 12.83                       |
| Targets Frontal ERP P3a (280-360 ms)          | 219                                                                         | 21.9                                             | 5.19                        |
| Targets Parietal ERP Early P300 (320-420 ms)  | 158                                                                         | 15.8                                             | 7.49                        |
| Targets Frontal ERP Late (420-580 ms)         | 152                                                                         | 15.2                                             | 3.05                        |
| Targets Parietal ERP N100 (60-140 ms)         | 29                                                                          | 2.9                                              | 2.53                        |
| Standards ERP Late (520-600 ms)               | 23                                                                          | 2.3                                              | 2.54                        |
| Targets LOW Early (40-160 ms)                 | 10                                                                          | 1                                                | 2.65                        |
| Standards GAMMA Mid-2 (220-260 ms)            | 6                                                                           | 0.6                                              | 3.11                        |
| Targets LOW Late ( 300-440 ms)                | 6                                                                           | 0.6                                              | 3.37                        |
| Standards GAMMA Mid (180-200 ms)              | 4                                                                           | 0.4                                              | 2.43                        |
| Targets GAMMA Late (340-600 ms)               | 3                                                                           | 0.3                                              | 3.87                        |

|                                             |   |     |      |
|---------------------------------------------|---|-----|------|
| Targets Parietal ERP Late P300 (420-600 ms) | 1 | 0.1 | 2.42 |
| Targets GAMMA Mid (140-180 ms)              | 1 | 0.1 | 2.68 |
| Targets GAMMA Mid-2 (240-280 ms)            | 0 | 0   | N/A  |

**Table s13:**

Canonical Discriminant Analysis Variate Means using Top 10 Variables from Table S11. Values are in Standardized Units.

|                   | <b>Average<br/>F-Value<br/>(4,1068)</b> | <b>HC</b> |      | <b>BDNP</b> |      | <b>BDP</b> |      | <b>SAD</b> |      | <b>SZ</b> |      | <b>BDNP BDP SAD SZ</b> |       |       |       |
|-------------------|-----------------------------------------|-----------|------|-------------|------|------------|------|------------|------|-----------|------|------------------------|-------|-------|-------|
|                   |                                         | Mean      | SD   | Mean        | SD   | Mean       | SD   | Mean       | SD   | Mean      | SD   | Glass Delta            |       |       |       |
| JK-CDA Variate 1: | 69.26                                   | 0.50      | 0.94 | 0.05        | 0.81 | 0.09       | 0.87 | -0.54      | 0.87 | -0.51     | 0.86 | -0.47                  | -0.44 | -1.10 | -1.06 |
| JK-CDA Variate 2: | 13.32                                   | -0.01     | 1.00 | 0.79        | 1.16 | -0.24      | 0.95 | -0.04      | 0.83 | 0.01      | 1.02 | 0.80                   | -0.23 | -0.03 | 0.02  |
| JK-CDA Variate 3: | 8.35                                    | 0.11      | 0.97 | -0.23       | 0.94 | -0.34      | 0.96 | 0.15       | 1.07 | 0.00      | 0.97 | -0.35                  | -0.46 | 0.04  | -0.11 |

| <b>Pearson Correlation</b> | <b>r-value</b> | <b>p-value</b> |
|----------------------------|----------------|----------------|
| CDA-1 vs JK-CDA 1          | .96            | < .0001        |
| CDA-2 vs JK-CDA 2          | .79            | < .0001        |
| CDA-3 vs JK-CDA 3          | .75            | < .0001        |

**Supplemental Figures**

**Figure S1: Frequency Principal Component Analysis.** The PCA factor weights of each component are plotted for each frequency from 3-52 Hz. The three components accounted for >95% of the variance.

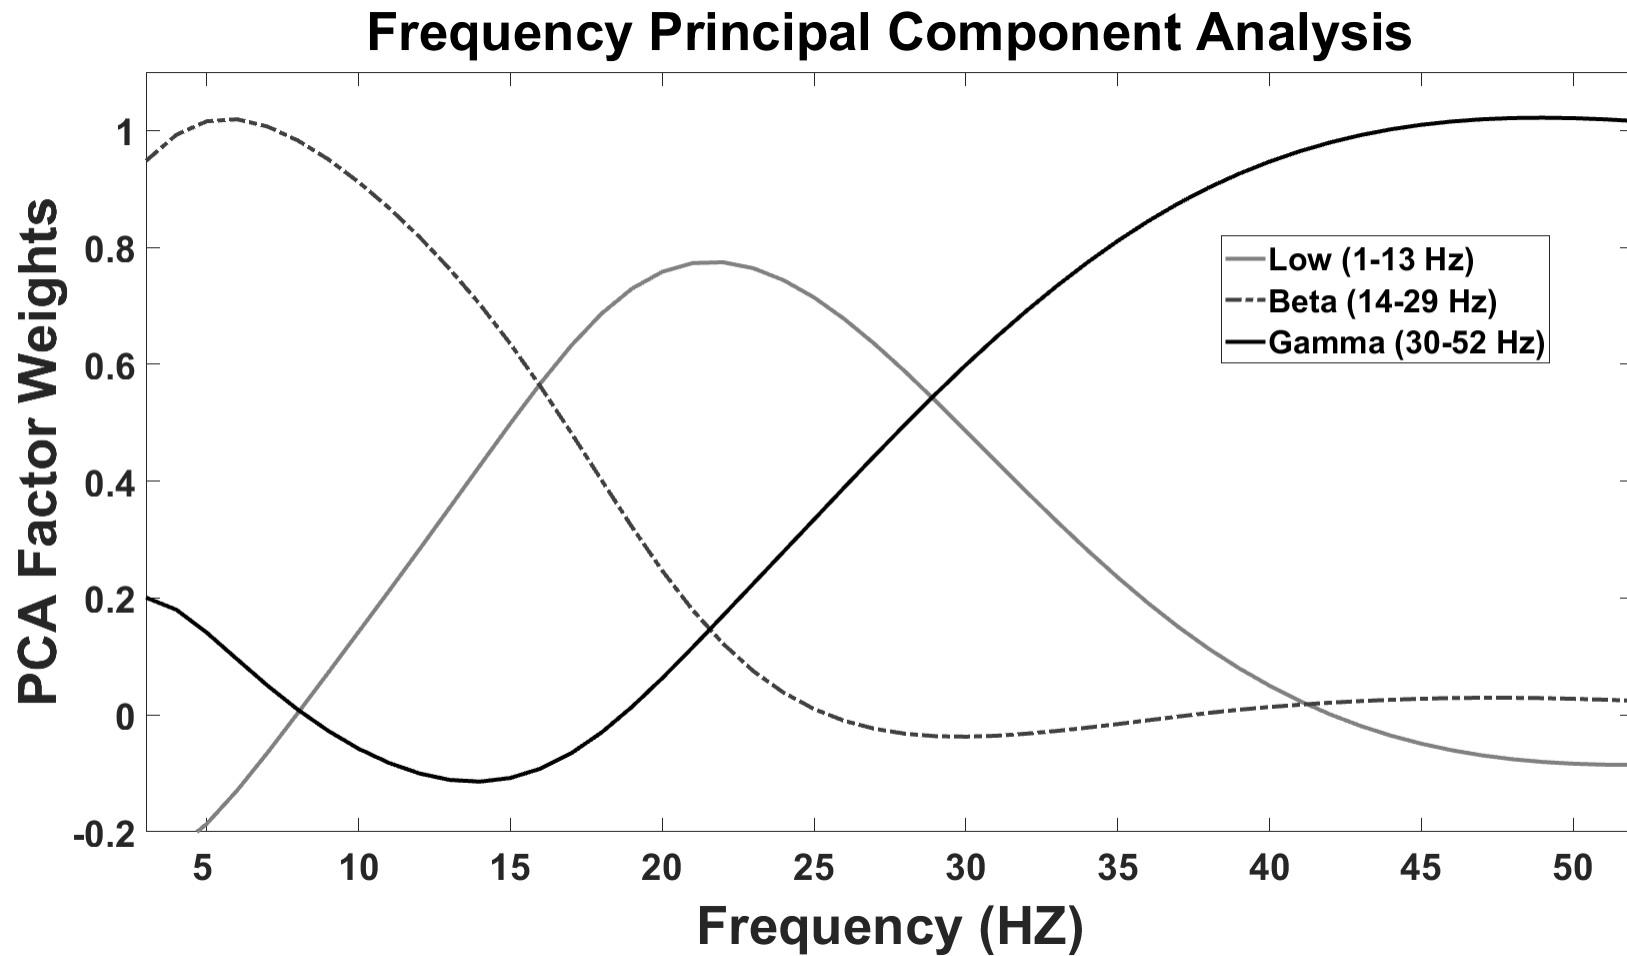



Figure S2: Scatter plot of the CDA neural values in comparison to the CCA neural values. Two-tailed Pearson correlation with a total

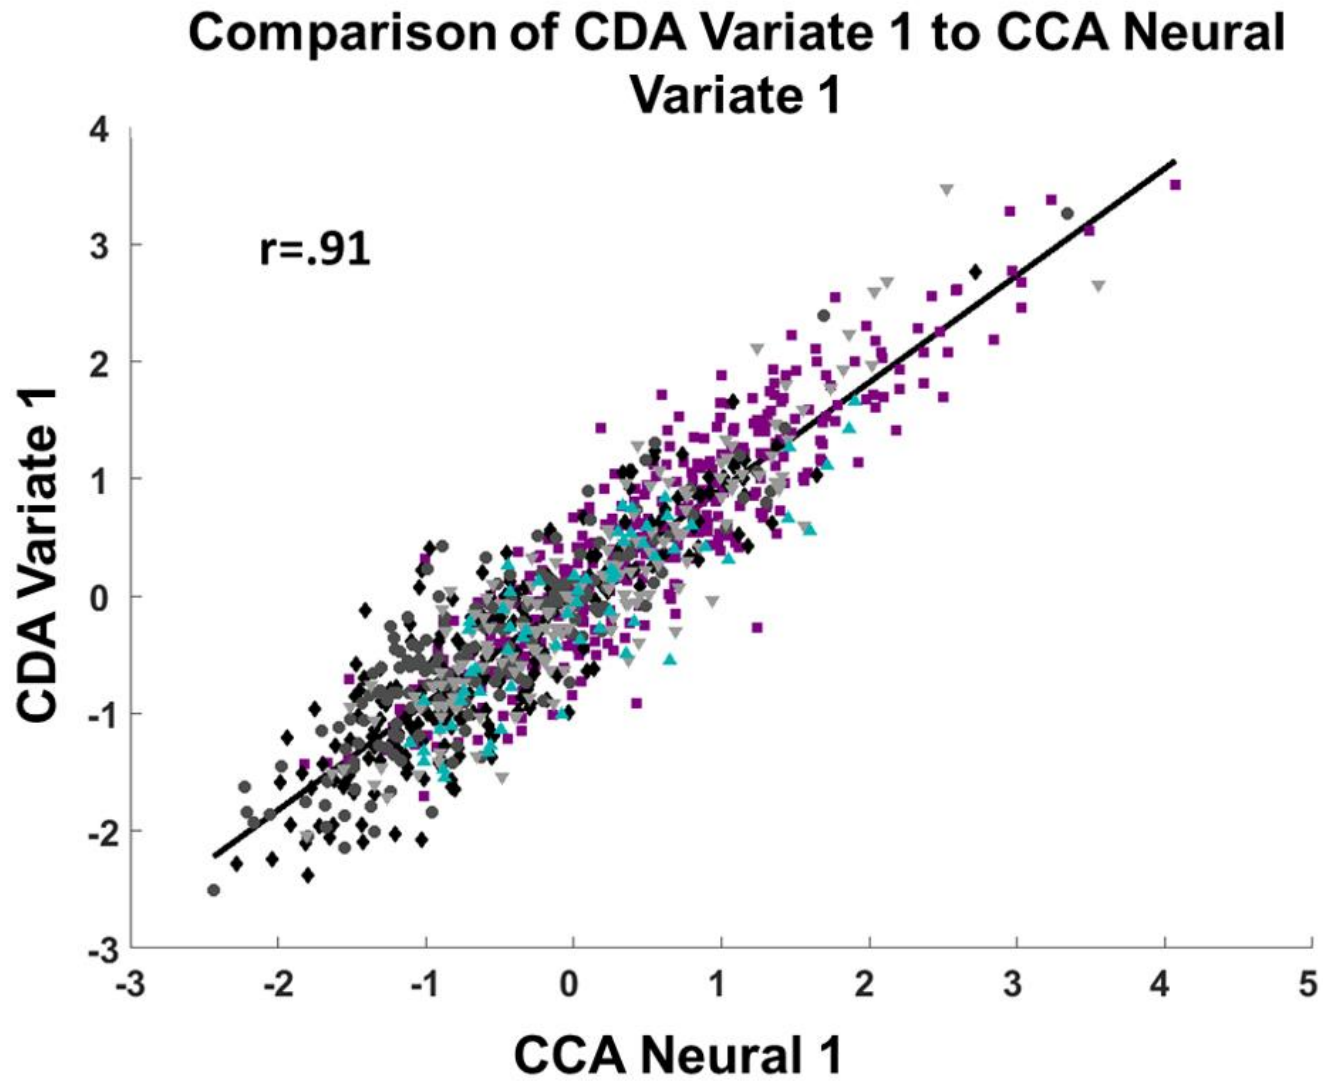

n=987.

**Figure S3:**

**Top: B-SNIP1 vs B-SNIP2 sample group x study effect sizes (95% CI) for each ERP component across each 20 ms time-bin.** An F effect size of .1 indicates a small effect size. No Group x Study p-values were <.05 after FDR correction. Effect size plots are not corrected for multiple comparisons.

**Bottom: Total Study, HC, and Psychosis equivalence contrasts in common language effect sizes (90% CI) for each ERP component across each 20 ms time-bin.** An effect size of .5 indicates no difference between samples. Contrast= B-SNIP1 – B-SNIP2. Contrasts effect size plots are not corrected for multiple comparisons. See supplemental methods for additional details.

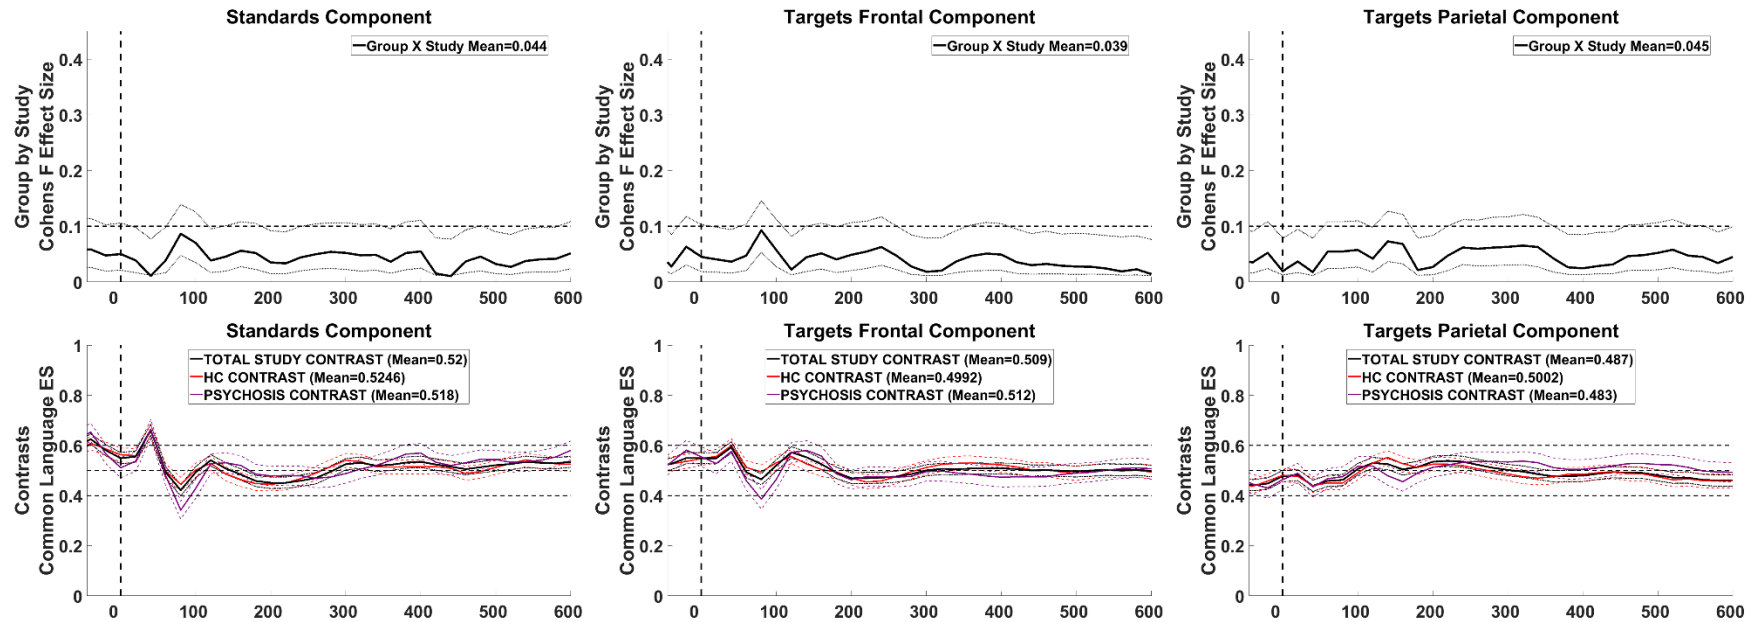

Supplement: appi.ajp.2021.20071043.ds001.pdf [file appi.ajp.2021.20071043.ds001.pdf]
